# Supplementary material
Source: PubMed Central journal article supplement (PMC3158205)
Supplement: 1101525108_sapp.pdf [file 1101525108_sapp.pdf]

## SUPPLEMENTARY INFORMATION

### I. TAXONOMIC DECISIONS

In this work we followed Wilson and Reeder (2005) and Reeves, Stewart, and Clapham's (2002) taxonomy. In the last 20 years several new species have been described such as *Mesoplodon perrini* (Dalebout 2002), *Orcaella heinsohni* (Beasley 2005), and the recognition of several species have been proposed for orcas (Perrin 1982, Pitman *et al.* 2007), Bryde's whales (Kanda *et al.* 2007), Blue whales (Garrigue *et al.* 2003, Ichihara 1996), Tucuxi dolphin (Cunha *et al.* 2005, Caballero *et al.* 2008), and other marine mammals. Since we used the conservation status of all species following IUCN (2011), this work is based on species recognized by this IUCN to keep a standardized baseline.

### II. SPECIES LIST

List of the species included in this paper, indicating their conservation status according to IUCN (2010.4) and its range area.

| Order     | Family                     | Species                            | IUCN 2010                  | Freshwater | Range area km <sup>2</sup> |
|-----------|----------------------------|------------------------------------|----------------------------|------------|----------------------------|
| Carnivora | Mustelidae                 | <i>Enhydra lutris</i>              | EN A2abe                   |            | 1,084,750,000,000          |
|           |                            | <i>Lontra felina</i>               | EN A3cd                    |            | 996,197,000,000            |
|           | Odobenidae                 | <i>Odobenus rosmarus</i>           | DD                         |            | 5,367,060,000,000          |
|           | Otariidae                  | <i>Arctocephalus australis</i>     | LC                         |            | 1,674,290,000,000          |
|           |                            | <i>Arctocephalus forsteri</i>      | LC                         |            | 1,823,240,000,000          |
|           |                            | <i>Arctocephalus galapagoensis</i> | EN A2a                     |            | 167,512,000,000            |
|           |                            | <i>Arctocephalus gazella</i>       | LC                         |            | 39,155,300,000,000         |
|           |                            | <i>Arctocephalus philippii</i>     | NT                         |            | 163,932,000,000            |
|           |                            | <i>Arctocephalus pusillus</i>      | LC                         |            | 1,705,430,000,000          |
|           |                            | <i>Arctocephalus townsendi</i>     | NT                         |            | 1,045,950,000,000          |
|           |                            | <i>Arctocephalus tropicalis</i>    | LC                         |            | 39,249,100,000,000         |
|           |                            | <i>Callorhinus ursinus</i>         | VU A2b                     |            | 12,935,900,000,000         |
|           |                            | <i>Eumetopias jubatus</i>          | EN A2a                     |            | 3,051,310,000,000          |
|           |                            | <i>Neophoca cinerea</i>            | EN A2bd+3d                 |            | 1,347,900,000,000          |
|           |                            | <i>Otaria flavescens</i>           | LC                         |            | 2,371,930,000,000          |
|           |                            | <i>Phocartos hookeri</i>           | VU A3b                     |            | 171,500,000,000            |
|           |                            | <i>Zalophus californianus</i>      | LC                         |            | 966,957,000,000            |
|           |                            | <i>Zalophus wollebaeki</i>         | EN A2a                     |            | 175,487,000,000            |
|           |                            | Phocidae                           | <i>Cystophora cristata</i> | VU A2b     |                            |
|           | <i>Erignathus barbatus</i> |                                    | LC                         |            | 12,550,800,000,000         |

|                                   |                               |                                          |                     |                     |                     |
|-----------------------------------|-------------------------------|------------------------------------------|---------------------|---------------------|---------------------|
|                                   |                               | <i>Halichoerus grypus</i>                | LC                  |                     | 2,443,290,000,000   |
|                                   |                               | <i>Histiophoca fasciata</i>              | DD                  |                     | 3,625,450,000,000   |
|                                   |                               | <i>Hydrurga leptonyx</i>                 | LC                  |                     | 9,900,130,000,000   |
|                                   |                               | <i>Leptonychotes weddellii</i>           | LC                  |                     | 7,146,790,000,000   |
|                                   |                               | <i>Lobodon carcinophaga</i>              | LC                  |                     | 18,961,100,000,000  |
|                                   |                               | <i>Mirounga angustirostris</i>           | LC                  |                     | 2,054,680,000,000   |
|                                   |                               | <i>Mirounga leonina</i>                  | LC                  |                     | 8,976,400,000,000   |
|                                   |                               | <i>Monachus monachus</i>                 | CR A2abc; C2a(i); E |                     | 2,730,360,000,000   |
|                                   |                               | <i>Monachus schauinslandi</i>            | CR A3ce+4ce         |                     | 503,740,000,000     |
|                                   |                               | <i>Ommatophoca rossii</i>                | LC                  |                     | 12,649,700,000,000  |
|                                   |                               | <i>Pagophilus groenlandicus</i>          | LC                  |                     | 8,352,950,000,000   |
|                                   |                               | <i>Phoca largha</i>                      | DD                  |                     | 5,173,220,000,000   |
|                                   |                               | <i>Phoca vitulina</i>                    | LC                  |                     | 4,233,030,000,000   |
|                                   |                               | <i>Pusa caspica</i>                      | EN A2abd+3bd+4abd   |                     | -                   |
|                                   |                               | <i>Pusa hispida</i>                      | LC                  |                     | 14,792,000,000,000  |
|                                   |                               | <i>Pusa sibirica</i>                     | LC                  | FW                  | -                   |
|                                   | Ursidae                       | <i>Ursus maritimus</i>                   | VU A3c              |                     | 10,273,300,000,000  |
| Cetacea                           | Balaenidae                    | <i>Balaena mysticetus</i>                | LC                  |                     | 8,735,490,000,000   |
|                                   |                               | <i>Eubalaena australis</i>               | LC                  |                     | 66,669,400,000,000  |
|                                   |                               | <i>Eubalaena glacialis</i>               | EN D                |                     | -                   |
|                                   |                               | <i>Eubalaena japonica</i>                | EN D                |                     | 5,995,590,000,000   |
|                                   | Balaenopteridae               | <i>Balaenoptera acutorostrata</i>        | LC                  |                     | 138,899,000,000,000 |
|                                   |                               | <i>Balaenoptera acutorostrata subsp.</i> | LC                  |                     | -                   |
|                                   |                               | <i>Balaenoptera bonaerensis</i>          | DD                  |                     | 235,109,000,000,000 |
|                                   |                               | <i>Balaenoptera borealis</i>             | EN A1ad             |                     | 325,876,000,000,000 |
|                                   |                               | <i>Balaenoptera edeni</i>                | DD                  |                     | 225,248,000,000,000 |
|                                   |                               | <i>Balaenoptera musculus</i>             | EN A1abd            |                     | 349,620,000,000,000 |
|                                   |                               | <i>Balaenoptera omurai</i>               | DD                  |                     | -                   |
|                                   |                               | <i>Balaenoptera physalus</i>             | EN A1d              |                     | 348,861,000,000,000 |
|                                   | <i>Megaptera novaeangliae</i> | LC                                       |                     | 349,580,000,000,000 |                     |
|                                   | Delphinidae                   | <i>Cephalorhynchus commersonii</i>       | DD                  |                     | 1,780,950,000,000   |
|                                   |                               | <i>Cephalorhynchus eutropia</i>          | NT                  |                     | 493,046,000,000     |
|                                   |                               | <i>Cephalorhynchus heavisidii</i>        | DD                  |                     | 802,273,000,000     |
|                                   |                               | <i>Cephalorhynchus hectori</i>           | EN A4d              |                     | 42,555,300,000      |
|                                   |                               | <i>Delphinus capensis</i>                | DD                  |                     | 9,313,700,000,000   |
|                                   |                               | <i>Delphinus delphis</i>                 | LC                  |                     | 31,026,900,000,000  |
|                                   |                               | <i>Feresa attenuata</i>                  | DD                  |                     | 198,729,000,000,000 |
| <i>Globicephala macrorhynchus</i> |                               | DD                                       |                     | 238,501,000,000,000 |                     |
| <i>Globicephala melas</i>         |                               | DD                                       |                     | 104,690,000,000,000 |                     |
| <i>Grampus griseus</i>            |                               | LC                                       |                     | 265,158,000,000,000 |                     |

|                |                                   |                 |    |                     |
|----------------|-----------------------------------|-----------------|----|---------------------|
|                | <i>Lagenodelphis hosei</i>        | LC              |    | 165,128,000,000,000 |
|                | <i>Lagenorhynchus acutus</i>      | LC              |    | 8,519,550,000,000   |
|                | <i>Lagenorhynchus albirostris</i> | LC              |    | 10,168,600,000,000  |
|                | <i>Lagenorhynchus australis</i>   | DD              |    | 590,641,000,000     |
|                | <i>Lagenorhynchus cruciger</i>    | LC              |    | 61,848,200,000,000  |
|                | <i>Lagenorhynchus obliquidens</i> | LC              |    | 20,853,700,000,000  |
|                | <i>Lagenorhynchus obscurus</i>    | DD              |    | 6,186,320,000,000   |
|                | <i>Lissodelphis borealis</i>      | LC              |    | 12,737,400,000,000  |
|                | <i>Lissodelphis peronii</i>       | DD              |    | 78,075,800,000,000  |
|                | <i>Orcinus orca</i>               | DD              |    | 159,671,000,000,000 |
|                | <i>Orcaella brevirostris</i>      | VU A4cd         |    | 4,252,570,000,000   |
|                | <i>Orcaella heinsohni</i>         | NT              |    | 1,264,170,000,000   |
|                | <i>Peponocephala electra</i>      | LC              |    | 167,492,000,000,000 |
|                | <i>Pseudorca crassidens</i>       | DD              |    | 115,652,000,000,000 |
|                | <i>Sotalia fluviatilis</i>        | DD              |    | 2,115,420,000,000   |
|                | <i>Sotalia guianensis</i>         | DD              |    | -                   |
|                | <i>Sousa chinensis</i>            | NT              |    | 15,839,700,000,000  |
|                | <i>Sousa teuszii</i>              | VU C2a(i)       |    | 1,554,490,000,000   |
|                | <i>Stenella attenuata</i>         | LC              |    | 185,346,000,000,000 |
|                | <i>Stenella clymene</i>           | DD              |    | 40,843,500,000,000  |
|                | <i>Stenella coeruleoalba</i>      | LC              |    | 247,740,000,000,000 |
|                | <i>Stenella frontalis</i>         | DD              |    | 45,684,100,000,000  |
|                | <i>Stenella longirostris</i>      | DD              |    | 197,320,000,000,000 |
|                | <i>Steno bredanensis</i>          | LC              |    | 220,032,000,000,000 |
|                | <i>Tursiops aduncus</i>           | DD              |    | 26,634,700,000,000  |
|                | <i>Tursiops truncatus</i>         | LC              |    | 232,786,000,000,000 |
| Eschrichtiidae | <i>Eschrichtius robustus</i>      | LC              |    | 5,640,160,000,000   |
| Iniidae        | <i>Inia geoffrensis</i>           | DD              | FW | -                   |
| Kogiaidae      | <i>Kogia breviceps</i>            | DD              |    | 251,271,000,000,000 |
|                | <i>Kogia sima</i>                 | DD              |    | 235,194,000,000,000 |
| Lipotidae      | <i>Lipotes vexillifer</i>         | CR C2a(ii), D   | FW | -                   |
| Monodontidae   | <i>Delphinapterus leucas</i>      | NT              |    | 10,167,800,000,000  |
|                | <i>Monodon monoceros</i>          | NT              |    | 6,370,340,000,000   |
| Neobalaenidae  | <i>Caperea marginata</i>          | DD              |    | 49,073,400,000,000  |
| Phocoenidae    | <i>Neophocaena phocaenoides</i>   | VU A2cde        |    | 4,086,040,000,000   |
|                | <i>Phocoena dioptrica</i>         | DD              |    | 2,431,640,000,000   |
|                | <i>Phocoena phocoena</i>          | LC              |    | 9,201,080,000,000   |
|                | <i>Phocoena sinus</i>             | CR A4d; C2a(ii) |    | 18,195,900,000      |
|                | <i>Phocoena spinipinnis</i>       | DD              |    | 1,274,860,000,000   |
|                | <i>Phocoenoides dalli</i>         | LC              |    | 19,888,000,000,000  |

|         |                            |                                |             |                     |                     |
|---------|----------------------------|--------------------------------|-------------|---------------------|---------------------|
|         | Physeteridae               | <i>Physeter macrocephalus</i>  | VU A1d      |                     | 239,682,000,000,000 |
|         | Platanistidae              | <i>Platanista gangetica</i>    | EN A2abcde  | FW                  | -                   |
|         |                            | <i>Platanista minor</i>        | -           | FW                  | -                   |
|         | Pontoporidae               | <i>Pontoporia blainvillei</i>  | VU A3d      |                     | 480,376,000,000     |
|         | Ziphiidae                  | <i>Berardius arnuxii</i>       | DD          |                     | 101,075,000,000,000 |
|         |                            | <i>Berardius bairdii</i>       | DD          |                     | 23,620,500,000,000  |
|         |                            | <i>Hyperoodon ampullatus</i>   | DD          |                     | 12,598,000,000,000  |
|         |                            | <i>Hyperoodon planifrons</i>   | LC          |                     | 86,815,900,000,000  |
|         |                            | <i>Indopacetus pacificus</i>   | DD          |                     | 106,594,000,000,000 |
|         |                            | <i>Mesoplodon bidens</i>       | DD          |                     | 13,884,300,000,000  |
|         |                            | <i>Mesoplodon bowdoini</i>     | DD          |                     | 4,419,570,000,000   |
|         |                            | <i>Mesoplodon carlhubbsi</i>   | DD          |                     | 1,096,570,000,000   |
|         |                            | <i>Mesoplodon densirostris</i> | DD          |                     | 257,754,000,000,000 |
|         |                            | <i>Mesoplodon europaeus</i>    | DD          |                     | 12,338,600,000,000  |
|         |                            | <i>Mesoplodon ginkgodens</i>   | DD          |                     | 3,486,050,000,000   |
|         |                            | <i>Mesoplodon grayi</i>        | DD          |                     | 66,140,000,000,000  |
|         |                            | <i>Mesoplodon hectori</i>      | DD          |                     | 5,066,070,000,000   |
|         |                            | <i>Mesoplodon layardii</i>     | DD          |                     | 83,734,500,000,000  |
|         |                            | <i>Mesoplodon mirus</i>        | DD          |                     | 6,300,090,000,000   |
|         |                            | <i>Mesoplodon perrini</i>      | DD          |                     | 8,015,760,000,000   |
|         |                            | <i>Mesoplodon peruvianus</i>   | DD          |                     | 12,321,700,000,000  |
|         |                            | <i>Mesoplodon stejnegeri</i>   | DD          |                     | 6,809,010,000,000   |
|         |                            | <i>Mesoplodon traversii</i>    | DD          |                     | -                   |
|         |                            | <i>Tasmacetus shepherdi</i>    | DD          |                     | 4,419,310,000,000   |
|         | <i>Ziphius cavirostris</i> | LC                             |             | 280,013,000,000,000 |                     |
| Sirenia | Dugongidae                 | <i>Dugong dugon</i>            | VU A2bcd    |                     | 6,586,460,000,000   |
|         | Trichechidae               | <i>Trichechus inunguis</i>     | VU A3cd     | FW                  | -                   |
|         |                            | <i>Trichechus manatus</i>      | VU C1       |                     | 2,189,720,000,000   |
|         |                            | <i>Trichechus senegalensis</i> | VU A3cd, C1 |                     | -                   |

### III. AREA CALCULATIONS (Goodes Homolosine Projection)

The Goode homolosine projection (or interrupted Goode homolosine projection) is an interrupted, pseudocylindrical, equal-area, composite map projection used for world maps. Its equal-area property makes it useful for raster data representation. The projection is composed of twelve regions that form six interrupted lobes. The lobes are the top sections of a Mollweide projection, and are carefully grafted on to six interior regions along the equator that are subject to a sinusoidal projection. Because the Mollweide is sometimes referred to as the "homolographic projection," the

two names "homolographic" and "sinusoidal" are fused in the name "homolosine," which Goode applied to this projection. If one looks carefully along the edges of the lobes, one can see a subtle discontinuity at approximately the 41st parallels. The equal-area nature of the Goode follows from the fact that its source projections are themselves both equal-area.

The projection was developed in 1923 by John Paul Goode to provide an effective alternative to portraying global areal relationships on the Mercator map.

This projection was quite common in the 1960's, when it gained the nickname "the orange-peel map" from its resemblance to a flattened, hand-peeled rind of that fruit. Since then the Peters projection, which distorts the shapes of the continents, has gained usage. (ESRI 2010).

#### IV. SPECIES IN KEY CONSERVATION SITES AND IRREPLACEABLE SITES

Global priority key conservation area indicating their species richness, endemism, endangerment, ecoregion where they are located, and ecoregion's threat<sup>37</sup>. Irreplaceable areas (i.e. containing species found nowhere else) are indicated with an asterisk; such areas usually have only one species.

|                         | Key conservation sites               | Number Species | Endemic/ Small-Range | Risk Category for each ecoregion* | Number and Name of the ecoregion*              | Estimated conservation status of the ecoregion* |
|-------------------------|--------------------------------------|----------------|----------------------|-----------------------------------|------------------------------------------------|-------------------------------------------------|
| <b>Highest Richness</b> | South African                        | 16             | 4                    | VU, EN                            | 209: Benguela Current<br>211: Agulhas Current  | V<br>RS                                         |
|                         | Argentinean                          | 15             | 4                    | VU, EN                            | 205: Patagonian Southwest Atlantic             | V                                               |
|                         | Australian                           | 14             | 4                    | VU, EN                            | 206: Southern Australian<br>222: Great Barrier | RS<br>RS                                        |
|                         | Baja Californian                     | 25             | 7                    | VU, EN, CR                        | 214: Gulf of California                        | CE                                              |
|                         | Peruvian                             | 19             | 5                    | VU, EN                            | 210: Humboldt Current                          | V                                               |
|                         | Japanese                             | 25             | 7                    | VU, EN, LR                        | 217: Nansei Shoto                              | CE                                              |
|                         | New Zealand                          | 13             | 2                    | VU, EN, LR                        | 207: New Zealand                               | V                                               |
|                         | Northwestern African                 | 25             | 7                    | VU, EN, LR                        | 216: Canary Current                            | CE                                              |
| <b>Irreplaceable</b>    | Northeastern American                | 25             | 7                    | VU, EN, LR                        | 202: Chesapeake Bay                            | V                                               |
|                         | Hawaiian Islands                     | 1 <sup>1</sup> | 1                    | EN                                | 227: Hawaiian Marine                           | V                                               |
|                         | Galapagos Islands                    | 1 <sup>2</sup> | 1                    | VU                                | 215: Galapagos Marine                          | V                                               |
|                         | San Félix and Juan Fernández Islands | 1 <sup>3</sup> | 1                    | VU                                | 210: Humboldt Current                          | V                                               |
|                         | Amazon River                         | 2 <sup>4</sup> | 1                    | VU                                | 147: Amazon River And Flooded Forests          | RS                                              |
| Mediterranean           | 1 <sup>5</sup>                       | 1              | CR                   | 199: Mediterranean Sea            | CE                                             |                                                 |

|  |                   |                 |   |            |                               |            |
|--|-------------------|-----------------|---|------------|-------------------------------|------------|
|  | Sea               |                 |   |            |                               |            |
|  | Indus River       | 1 <sup>6</sup>  | 1 | Not Listed | Not Listed                    | Not Listed |
|  | Ganges River      | 1 <sup>7</sup>  | 1 | EN         | Not Listed                    | Not Listed |
|  | Yang-tse River    | 1 <sup>8</sup>  | 1 | EX         | 149: Yang-Tse River And Lakes | CE         |
|  | Baikal Lake       | 1 <sup>9</sup>  | 1 | LR         | 184: Lake Baikal              | V          |
|  | Caspian Sea       | 1 <sup>10</sup> | 1 | VU         | Not Listed                    | Not Listed |
|  | Kerguelen Islands | 1 <sup>11</sup> | 1 | Not Listed | Not Listed                    | Not Listed |

<sup>1</sup>*Monachus schauinslandi*, <sup>2</sup>*Arctocephalus galapagoensis*, <sup>3</sup>*A. philippii*, <sup>4</sup>*Inia geoffrensis*, *Trichechus inunguis* (both freshwater), and *Sotalia fluviatilis*, <sup>5</sup>*Monachus monachus*, <sup>6</sup>*Platanista minor* (freshwater), <sup>7</sup>*Platanista gangetica* (freshwater), <sup>8</sup>*Lipotes vexillifer* (freshwater), <sup>9</sup>*Pusa sibirica* (freshwater), <sup>10</sup>*Pusa caspica*, <sup>11</sup>*Cephalorhynchus commersonii* and *A gazella*.  
\* VU=Vulnerable, EN= Endangered, CR= Critically Endangered, LR= Lesser Risk, EX= Extinct, CE: Critically Endangered, V: Vulnerable, RS: Relatively Stable or Intact. Data from Olson and Dinerstein (2002).

## V. ESTABLISHED PROTECTED AREAS AND THREAT IN THE KEY CONSERVATION AREAS DEIFINED IN THIS PAPER

In the following table the proposed or established marine protected area (MPA) or sanctuary (SAC) in each Key Conservation Site are mentioned as an indication of their protection and management to reduce impacts of human activities. The species present are also recorded for each site, as well as threats such as overfishing and pollution (Data modified from Hoyt, 2005).

| World Commission on Protected Areas (WCPA) - IUCN Region | SACs and MPAs with location and size* included in the Key Conservation Site (*only water)               | Marine mammals present, including endangered species                                                                                                                                                                                                                                                                                                                                | Threats detected                                          | Endangered marine mammals included |
|----------------------------------------------------------|---------------------------------------------------------------------------------------------------------|-------------------------------------------------------------------------------------------------------------------------------------------------------------------------------------------------------------------------------------------------------------------------------------------------------------------------------------------------------------------------------------|-----------------------------------------------------------|------------------------------------|
| Northeast Pacific (15)                                   | <b>Baja Californian Key Conservation Site</b>                                                           |                                                                                                                                                                                                                                                                                                                                                                                     |                                                           |                                    |
|                                                          | El Vizcaino Biosphere Reserve (5 km, includes lagoons of Ojo de Liebre, San Ignacio and Guerrero Negro) | Shared habitat for large whales and dolphins, frequented by migrating cetaceans, serves as mating and breeding grounds, and for some species feeding ground. Spot or annual gray whale migration. Laguna San Ignacio is the only primary gray whale breeding/calving area in Mexico that remains unaltered by industrial development. Sei, Minke, Blue, Bryde, Fin and Sperm whales | Ecosystemic damage by saltworks, dump and noise pollution |                                    |
|                                                          | Revillagigedo Archipelago Biosphere Reserve (6,193 km <sup>2</sup> )                                    | One of the key humpback whale breeding grounds in the North Pacific. Management plan under review                                                                                                                                                                                                                                                                                   | Illegal fishing                                           |                                    |
|                                                          | Islas Marias Biosphere Reserve (4,052 km <sup>2</sup> )                                                 | Humpback whale breeding ground, management plan under review                                                                                                                                                                                                                                                                                                                        | Illegal fishing                                           |                                    |
|                                                          | Loreto Bay National Park (1,820 km <sup>2</sup> )                                                       | May not include extensive cetacean critical habitat <i>per se</i> , but the park does benefit feeding grounds                                                                                                                                                                                                                                                                       |                                                           |                                    |
|                                                          | Upper Gulf of California and Colorado River Delta Biosphere Reserve (9,600 km <sup>2</sup> )            | Protects the endangered Vaquita and the Colorado River Delta wetlands. Vaquita                                                                                                                                                                                                                                                                                                      | Bycatch                                                   | Vaquita                            |

|                        |                                                                                   |                                                                                                                                                                                      |                                                                        |                                                    |
|------------------------|-----------------------------------------------------------------------------------|--------------------------------------------------------------------------------------------------------------------------------------------------------------------------------------|------------------------------------------------------------------------|----------------------------------------------------|
|                        | Bahía Magdalena National Gray Whale Refuge                                        | Proposed MPA to protect gray whale breeding and calving habitat                                                                                                                      |                                                                        |                                                    |
|                        | Monterrey Bay National Marine Sanctuary (13,802 km <sup>2</sup> )                 | Abundant cetaceans and other marine mammals. Sea otter, Steller Sea Lion                                                                                                             | Oil and gas exploration, waste dumping and other discharges, fisheries |                                                    |
|                        | Gulf of the Farallones National Marine Sanctuary (3251 km <sup>2</sup> )          |                                                                                                                                                                                      |                                                                        |                                                    |
|                        | Cordell Bank National Marine Sanctuary (1,363 km <sup>2</sup> )                   | Critical habitat for marine mammals and seabirds                                                                                                                                     | Frequent naval operations                                              |                                                    |
|                        | Channel Islands National Marine Sanctuary (4,295 km <sup>2</sup> )                | Protects key habitats for marine mammals including cetaceans, extensive pinniped rookeries and seabirds                                                                              | Oil and gas exploration, waste dumping and other discharges, fisheries |                                                    |
| Southeast Pacific (17) | <b>Peruvian Key Conservation Site</b>                                             |                                                                                                                                                                                      |                                                                        |                                                    |
|                        | Paracas National Reserve (2,177 km <sup>2</sup> )                                 | Little research into cetaceans in the MPS except for the resident bottlenosed dolphins and small cetacean-fisheries interactions. Marine otter, South American sea lion and fur seal |                                                                        | Marine otter, South American sea lion and fur seal |
|                        | <b>Galapagos Islands Key Conservation Site</b>                                    |                                                                                                                                                                                      |                                                                        |                                                    |
|                        | Galapagos Marine Resources Reserve and Whale Sanctuary (158,000 km <sup>2</sup> ) | Endemic Galapagos fur seal and sea lion; cetacean mating and breeding area and frequented by migrating cetaceans                                                                     | Shipping, comercial fishing and tourism                                |                                                    |
|                        | <b>San Félix &amp; Juan Fernández Islands Key Conservation Site</b>               |                                                                                                                                                                                      |                                                                        |                                                    |
|                        | Caldera MPA                                                                       | Proposed and in process. Contains 43% of the cetacean diversity recorded for Chile. Sei, Antarctic Minke, Blue, Bryde and Fin whales                                                 | Comercial fishing, ilegal dolphin hunt, poor management                |                                                    |



|                        |                                                                               |                                                                                                                                                                                                                  |                                                                                   |                            |
|------------------------|-------------------------------------------------------------------------------|------------------------------------------------------------------------------------------------------------------------------------------------------------------------------------------------------------------|-----------------------------------------------------------------------------------|----------------------------|
|                        | Humboldt Penguin National Reserve (8.6 km <sup>2</sup> )                      | Proposed for expansion at Los Choros MPA. Sperm whale                                                                                                                                                            | Uncontrolled dolphin watching activities, dolphin killing                         |                            |
| Northwest Atlantic (4) | <b>Northeastern American Key Conservation Site</b>                            |                                                                                                                                                                                                                  |                                                                                   |                            |
|                        | Monitor National Marine Sanctuary (3.4 km <sup>2</sup> )                      | The sanctuary itself is too small to afford real protection without considerable expansion of its size and effective mandate. North Atlantic Right, Sei, Minke, Blue, Bryde and Fin whales; Sperm whale; Manatee | Whale watching industry, toxic waste dumping, vessel collisions with cetaceans    | North Atlantic Right Whale |
| South Atlantic (9)     | <b>Argentinean Key Conservation Site</b>                                      |                                                                                                                                                                                                                  |                                                                                   |                            |
|                        | South Atlantic Sanctuary                                                      | Proposed MPA                                                                                                                                                                                                     | Commercial whaling                                                                |                            |
|                        | Bahia Anegada Nature Reserve (73.86 km <sup>2</sup> )                         | Breeding areas for South American sea lion and important research site of Franciscana; no management plan. Franciscana.                                                                                          |                                                                                   | Franciscana                |
|                        | Golfo San José Provincial Marine Park                                         | Critical breeding area for Southern Right Whales                                                                                                                                                                 | Whale watching industry                                                           |                            |
|                        | Punta Loma Faunal Reserve (17.1 km <sup>2</sup> )                             | Sei, Antarctic Minke, Blue, Bryde and Fin whales                                                                                                                                                                 | Water contamination, shipping traffic and increasing fishing activity in the area |                            |
|                        | Punta Norte Provincial Faunal Reserve (0.06 km <sup>2</sup> )                 | Sperm Whale                                                                                                                                                                                                      | Fisheries                                                                         |                            |
|                        | Punta Pirámide Nature Reserve (1.32 km <sup>2</sup> )                         |                                                                                                                                                                                                                  |                                                                                   |                            |
|                        | Península Valdés Nature Reserve (3,600 km <sup>2</sup> mostly including land) |                                                                                                                                                                                                                  |                                                                                   |                            |
| West Africa (8)        | <b>Northwestern African Key Conservation Site</b>                             |                                                                                                                                                                                                                  |                                                                                   |                            |
|                        | South Atlantic Sanctuary                                                      | Proposed MPA                                                                                                                                                                                                     | Comercial whaling                                                                 |                            |

|                        |                                                                                           |                                                                                                                         |                                                                                                                              |  |
|------------------------|-------------------------------------------------------------------------------------------|-------------------------------------------------------------------------------------------------------------------------|------------------------------------------------------------------------------------------------------------------------------|--|
|                        | Canary Islands Cetacean Marine Sanctuary                                                  | Proposed MPA containing at least 26 cetacean species. Sei, Minke, Blue, Bryde and Fin whales; Atlantic Humpback dolphin | Noise pollution and frequent naval operations, fisheries, pollution, oil, gas, and human development                         |  |
|                        | Chinijo Archipelago Natural Park (91 km <sup>2</sup> )                                    | Sperm Whale                                                                                                             |                                                                                                                              |  |
|                        | Natural Marine Park of the Whales and Franja Marina Teno Rasca SAC (695 km <sup>2</sup> ) |                                                                                                                         |                                                                                                                              |  |
|                        | Franja Marina Santiago - Valle Gran Rey SAC (131.4 km <sup>2</sup> )                      |                                                                                                                         |                                                                                                                              |  |
|                        | Sebadales de La Graciosa SAC (11.9 km <sup>2</sup> )                                      |                                                                                                                         |                                                                                                                              |  |
|                        | Mar de las Calmas SAC (99 km <sup>2</sup> )                                               |                                                                                                                         |                                                                                                                              |  |
|                        | Sebadales de Corralejo SAC (19.4 km <sup>2</sup> )                                        |                                                                                                                         |                                                                                                                              |  |
|                        | <b>South African Key Conservation Site</b>                                                |                                                                                                                         |                                                                                                                              |  |
|                        | Dwesa-Cwebe MPA (176 km <sup>2</sup> )                                                    | No management or zoning plan                                                                                            | Fisheries, bycatch, pollution and human development, illegal dolphin hunt                                                    |  |
|                        | Mkambati MPA (130 km <sup>2</sup> )                                                       | No management or zoning plan                                                                                            |                                                                                                                              |  |
|                        | Hluleka MPA                                                                               | No management or zoning plan                                                                                            |                                                                                                                              |  |
|                        | Trafalgar MPA (2.5 km <sup>2</sup> )                                                      | Very limited management                                                                                                 |                                                                                                                              |  |
|                        | <b>Japanese Key Conservation Site</b>                                                     |                                                                                                                         |                                                                                                                              |  |
| Northwest Pacific (16) | Finless Porpoise Gathering Area National Monument (1.5 km)                                | Sperm whale, Finless porpoise                                                                                           | Fisheries, bycatch, pollution and human development, illegal dolphin hunt, shipping traffic, poaching, gold mine excavations |  |
|                        | Seto-naikai National Park (628 km <sup>2</sup> )                                          | North Pacific Right, Sei, Minke Blue, Bryde and Fin whales                                                              |                                                                                                                              |  |
|                        | Kurilskiy Nature Reserve (2 km)                                                           |                                                                                                                         |                                                                                                                              |  |
|                        | Poronayskiy Nature Reserve (567 km <sup>2</sup> including many land areas)                |                                                                                                                         |                                                                                                                              |  |
| Australia - New        | <b>Australian Key Conservation Site</b>                                                   |                                                                                                                         |                                                                                                                              |  |

|                    |                                                                                                |                                                                                                                                                                                                                                      |                                                                                         |                    |
|--------------------|------------------------------------------------------------------------------------------------|--------------------------------------------------------------------------------------------------------------------------------------------------------------------------------------------------------------------------------------|-----------------------------------------------------------------------------------------|--------------------|
| Zealand (18)       | Solitary Islands Marine Reserve and Marine Park (710 km <sup>2</sup> )                         | Management plan has key habitat provisions for cetaceans                                                                                                                                                                             | Recreational and commercial boating traffic, entanglement, noise, and depletion of prey |                    |
|                    | Cape Byron Marine Park (227 km <sup>2</sup> )                                                  | 11 cetacean species. Important long-term monitoring of migrating humpback whales, as well as a refuge area for humpback mothers and calves on migration. Sei, Antarctic Minke, Blue, Bryde and Fin whales; Irrawaddy dolphin; Dugong | Fishing, entanglement, jet-skis and commercial shipping                                 |                    |
|                    | Jervis Bay Marine Park (220 km <sup>2</sup> )                                                  | Sperm whale                                                                                                                                                                                                                          | Whale watching industry                                                                 |                    |
|                    | Port Stephens Marine Park (140 km <sup>2</sup> approx.)                                        | May be proposed                                                                                                                                                                                                                      | Dolphin watching                                                                        |                    |
|                    | <b>New Zealand Key Conservation Site</b>                                                       |                                                                                                                                                                                                                                      |                                                                                         |                    |
|                    | Banks Peninsula Marine Mammal Sanctuary and <i>proposed</i> extension (1,140 km <sup>2</sup> ) | Sei, Antarctic Minke, Blue, Bryde and Fin whales                                                                                                                                                                                     | Dolphin entanglement, fisheries                                                         |                    |
|                    | Akaroa Harbour Marine Reserve                                                                  | Proposed                                                                                                                                                                                                                             |                                                                                         | Hector's Dolphin   |
|                    | Doubtful Sound Marine Sanctuary                                                                | Proposed                                                                                                                                                                                                                             | Dolphin watching                                                                        |                    |
| South Pacific (14) | <b>Hawaiian Islands Key Conservation Site</b>                                                  |                                                                                                                                                                                                                                      |                                                                                         |                    |
|                    | Hawaiian Islands Humpback Whale National Marine Sanctuary (3,368 km <sup>2</sup> )             | Key Humpback whale winter breeding, singing, calving, and nursing habitat. Hawaiian Monk Seal, Sei, Minke, Blue, Bryde and Fin whales; Sperm whale                                                                                   | Fisheries, fishing, military activities.                                                | Hawaiian Monk Seal |
| Mediterranean      | <b>Mediterranean Sea Key Conservation Site</b>                                                 |                                                                                                                                                                                                                                      |                                                                                         |                    |

|               |                                                            |                                                                                                                                                                                                |                                     |                         |
|---------------|------------------------------------------------------------|------------------------------------------------------------------------------------------------------------------------------------------------------------------------------------------------|-------------------------------------|-------------------------|
| (3)           | 59 MPA or SCA contained (at least 91,568 km <sup>2</sup> ) | 14 species with applicable appendices of international conventions, directives and agreements; declining population of common dolphins (>100). Mediterranean Monk Seal                         | High contaminant levels and fishing | Mediterranean Monk Seal |
| Antarctic (1) | <b>Kerguelen Islands Key Conservation Site</b>             |                                                                                                                                                                                                |                                     |                         |
|               | Heard & McDonald Islands (65,000 km <sup>2</sup> )         | Not designed specifically around cetacean habitat, but because of its size it almost certainly contains some significant cetacean habitat. Sei, Minke, Blue, Bryde and Fin whales; Sperm whale |                                     |                         |

## V. REFERENCES

- Beasley, I. *et al.* (2005) Description of a new dolphin, the Australian snubfin dolphin *Orcaella heinsohni* sp. n. (Cetacea, Delphinidae). *Mar. mamm. sci.* 21(3): 365-40. (2005).
- Caballero, S. *et al.* (2008) Molecular systematics of South American dolphins *Sotalia*: Sister taxa determination and phylogenetic relationships, with insights into a multi-locus phylogeny of the Delphinidae. *Mol. phyl. evol.* 23: 358-386.
- Cunha, H. A. *et al.* (2005) Riverine and marine ecotypes of *Sotalia* dolphins are different species. *Marine Biology* 148: 449-457.
- Dalebout, M. *et al.* (2002) A new species of beaked whale *Mesoplodon perrini* sp. (Cetacea: Ziphiidae) discovered through phylogenetic analyses of mitochondrial DNA sequences. *Mar. mamm. sci.* 18(3): 577–608.
- ESRI (2010). ArcGIS 9.2 Desktop Help.  
[http://webhelp.esri.com/arcgisdesktop/9.2/index.cfm?TopicName=Goodes\\_Homolosine](http://webhelp.esri.com/arcgisdesktop/9.2/index.cfm?TopicName=Goodes_Homolosine)
- Garrigue, C., Clua, E. & Breitenstein, D. (2003) Identification of a juvenile pygmy blue whale (*Balaenoptera musculus brevicauda*) in New Caledonia, South-West Pacific. SC/55/SH4.
- Hoyt, E. (2005). *Marine Protected Areas for whales, dolphins and porpoises*. Earthscan. London, England. 492 p.
- Ichihara, T. (1996) in Norris, K.S. (ed.) Whales, dolphins and porpoises. Los Angeles: *University of California Press*. pp. 79-113.
- IUCN (2011). *The 2010.4 version of the IUCN red list of threatened species*. IUCN, Gland, Switzerland (2011). <<http://www.iucnredlist.org/>>
- Kanda, N. *et al.* (2007) Population genetic structure of Brydes Whale (*Balaenoptera brydei*) at the inter-oceanic and trans-equatorial levels. *Cons. Gen.* 8: 853-864.
- Olson, D. & Dinerstein, E. (2002) The global 200: Priority ecoregions for global conservation. *Ann. Missouri Bot. Gard.* 89: 199-224.
- Perrin, W. (1982) in World Cetacean Database, Perrin, W. F. eds. Accessed through the World Register of Marine <<http://marinespecies.org/aphia.php?p=taxdetails&id=380525> on 2009-08-06>
- Pitman, R. *et al.* (2007) A dwarf form of killer whale in Antarctica. *Jour. Mamm.* 88(1): 43-48.
- Reeves, R., Stewart, B., Clapham, P. & Powell, J. (2002) Guide to Marine Mammals of the World. *Nat. Audubon Soc.*, Alfred A. Knopf. USA.

Wilson, D. E. & Reeder, M. (2005) *Mammal Species of the World. A Taxonomic and Geographic Reference* (3rd ed), *Johns Hopkins University Press*, 2,142 pp.
